# Supplementary material
Source: publisher figshare collection journal article supplement (https://sage.figshare.com/ndownloader/files/15086198)
Supplement: Supplementary file 1 [file 15086198]

## Appendix A

### Survey Instrument Questionnaire

My department often asks me to handle technology issues that are not related to crime analysis.

- Strongly Agree (1)
- Agree (2)
- Disagree (3)
- Strongly Disagree (4)

My department asks me to fix computers for other officers.

- Strongly Agree (1)
- Agree (2)
- Disagree (3)
- Strongly Disagree (4)

I feel that patrol officers understand my role in the department.

- Strongly Agree (1)
- Agree (2)
- Disagree (3)
- Strongly Disagree (4)

I know what my responsibilities are.

- Strongly Agree (1)
- Agree (2)
- Disagree (3)
- Strongly Disagree (4)

My role in the department is clearly defined.

- Strongly Agree (1)
- Agree (2)
- Disagree (3)
- Strongly Disagree (4)

Crime analysts increase the effectiveness of police departments.

- Strongly Agree (1)
- Agree (2)
- Disagree (3)
- Strongly Disagree (4)

The technology in my department is cutting-edge.

- Strongly Agree (1)
- Agree (2)
- Disagree (3)
- Strongly Disagree (4)

I have the technology I need to do my job effectively.

- Strongly Agree (1)
- Agree (2)
- Disagree (3)
- Strongly Disagree (4)

I have received the training I need to use my department's technology effectively.

- Strongly Agree (1)
- Agree (2)
- Disagree (3)
- Strongly Disagree (4)

I feel comfortable using the technology in my department.

- Strongly Agree (1)
- Agree (2)
- Disagree (3)
- Strongly Disagree (4)

I received adequate statistical training from my department.

- Strongly Agree (1)
- Agree (2)
- Disagree (3)
- Strongly Disagree (4)

I feel like my superiors appreciate the products I create.

- Strongly Agree (1)
- Agree (2)
- Disagree (3)
- Strongly Disagree (4)

The products I create frequently aid investigations.

- Strongly Agree (1)
- Agree (2)
- Disagree (3)
- Strongly Disagree (4)

The products I create are easily understood by patrol officers.

- Strongly Agree (1)
- Agree (2)
- Disagree (3)
- Strongly Disagree (4)

Patrol officers often ask for my assistance with a problem.

- Strongly Agree (1)
- Agree (2)
- Disagree (3)
- Strongly Disagree (4)

Detectives often ask for my assistance with an investigation.

- Strongly Agree (1)
- Agree (2)
- Disagree (3)
- Strongly Disagree (4)

Top management gives me the resources I need to disseminate my findings to patrol officers.

- Strongly Agree (1)
- Agree (2)
- Disagree (3)
- Strongly Disagree (4)

I believe that an assigned patrol officer-analyst partnership would be beneficial.

- Strongly Agree (1)
- Agree (2)
- Disagree (3)
- Strongly Disagree (4)

With 40 hours of training, any patrol officers could perform my daily duties.

- Strongly Agree (1)
- Agree (2)
- Disagree (3)
- Strongly Disagree (4)

I think that having an advanced degree is important to become a crime analyst.

- Strongly Agree (1)
- Agree (2)
- Disagree (3)
- Strongly Disagree (4)

I think that having a strong background in criminological theory is important to become a crime analyst.

- Strongly Agree (1)
- Agree (2)
- Disagree (3)
- Strongly Disagree (4)

I think that having a strong background in police strategies is important for my job.

- Strongly Agree (1)
- Agree (2)
- Disagree (3)
- Strongly Disagree (4)

I understand what patrol officers are realistically capable of doing.

- Strongly Agree (1)
- Agree (2)
- Disagree (3)
- Strongly Disagree (4)

I think my department employs a sufficient number of crime analysts.

- Strongly Agree (1)
- Agree (2)
- Disagree (3)
- Strongly Disagree (4)

I think my department employs too few crime analysts.

- Strongly Agree (1)
- Agree (2)
- Disagree (3)
- Strongly Disagree (4)

A lot of time my job makes me very frustrated or angry.

- Strongly Agree (1)
- Agree (2)
- Disagree (3)
- Strongly Disagree (4)

I find real enjoyment in my job.

- Strongly Agree (1)
- Agree (2)
- Disagree (3)
- Strongly Disagree (4)

I like my job better than the average crime analyst.

- Strongly Agree (1)
- Agree (2)
- Disagree (3)
- Strongly Disagree (4)

Have you ever served as a patrol officer?

- Yes (1)
- No (2)

Are you a sworn police officer in a police department?

- Yes (1)
- No (2)

What is your highest level of education?

- High School Diploma or Less (1)
- Some College (2)
- Associate's Degree (3)
- Bachelor's Degree (4)
- Graduate/Law/Professional Degree (5)

How many years of experience do you have as a crime analyst?

---

How many years of experience do you have in policing in total?

---

What most accurately reflects the place where you work?

City/County Police Department (1)

County Sheriff's Office (2)

State Police/Highway Patrol (3)

Federal Law Enforcement (4)

Private Sector (5)

University (6)

Other (7) \_\_\_\_\_
